# Supplementary material for: Predictive Biomarkers and Patient Outcome in Platinum-Resistant (PLD-Treated) Ovarian Cancer
Source: PubMed Central journal article supplement (PMC7459532; doi:10.3390/diagnostics10080525), 2020-07-28
Supplement: diagnostics-10-00525-s001.pdf [file diagnostics-10-00525-s001.pdf]

Article

# Predictive Biomarkers and Patient Outcome in Platinum-Resistant (PLD-Treated) Ovarian Cancer

Isabel J. Dionísio de Sousa <sup>1,2</sup>, Durval S. Marques <sup>3,4</sup>, Catarina Príncipe <sup>5,6,7</sup>, Raquel V. Portugal <sup>1,8</sup>, Sule Canberk <sup>5,6</sup>, Hugo Prazeres <sup>5,6</sup>, José M. Lopes <sup>1,5,6,8</sup>, Etel R.P. Gimba <sup>3,4</sup>, Raquel T. Lima <sup>1,5,6,8,\*</sup>, and Paula Soares <sup>1,5,6,8</sup>

**Supplementary Data** Additional data regarding tumor samples analyzed.

“Non-high grade serous carcinoma”—32% (9/28) and 48% (10/21) in PLD and non-PLD arms, respectively.

“Low-grade serous carcinoma”—18% (5/28) and 33% (7/21) of the cases in the PLD and non-PLD groups, respectively.

Among responders, in the PLD arm, 1 case was non-high grade serous carcinoma (endometrioid carcinoma) and, in the non-PLD group, 8 were non-high grade serous carcinoma (5 low-grade serous, 2 clear cell and 1 mucinous carcinoma).

**Table S1.** Staining intensity and proportion of positive stained cells of E-cadherin, vimentin, OPN, and OPN-c IHC in the non-PLD arm.

| Non-PLD Arm.<br>Analysed ( <i>n</i> = 21)   | E-cadherin | Vimentin   | Cytoplasmic<br>OPN | Membrane<br>OPN | Nuclear<br>OPN-c | Cytoplasmic<br>OPN-c |
|---------------------------------------------|------------|------------|--------------------|-----------------|------------------|----------------------|
| <b>Proportion of positive stained cells</b> |            |            |                    |                 |                  |                      |
| < 5%                                        | 3 (14.3%)  | 13 (61.9%) | 13 (61.9%)         | 15 (71.4%)      | 1 (4.8%)         | 9 (42.9%)            |
| 5–25%                                       | 1 (4.8%)   | 5 (23.8%)  | 3 (14.3%)          | 1 (4.8%)        | 2 (9.5%)         | 3 (14.3%)            |
| 25–50%                                      | 5 (23.8%)  | 1 (4.8%)   | 2 (9.5%)           | 2 (9.5%)        | 0 (0.0%)         | 1 (4.8%)             |
| 50–75%                                      | 2 (9.5%)   | 1 (4.8%)   | 2 (9.5%)           | 2 (9.5%)        | 5 (23.8%)        | 2 (9.5%)             |
| > 75%                                       | 10 (47.6%) | 1 (4.8%)   | 1 (4.8%)           | 1 (4.8%)        | 13 (61.9%)       | 6 (28.6%)            |
| <b>Staining intensity</b>                   |            |            |                    |                 |                  |                      |
| Absent                                      | 3 (14.3%)  | 8 (38.1%)  | 7 (33.3%)          | 14 (66.7%)      | 1 (4.8%)         | 9 (42.9%)            |
| Faint                                       | 2 (9.5%)   | 1 (4.8%)   | 5 (23.8%)          | 0 (0.0%)        | 7 (33.3%)        | 8 (38.1%)            |
| Moderate                                    | 10 (47.6%) | 4 (19.0%)  | 7 (33.3%)          | 3 (14.3%)       | 6 (28.6%)        | 2 (9.5%)             |
| Strong                                      | 6 (28.6%)  | 8 (38.1%)  | 2 (9.5%)           | 4 (19.0%)       | 7 (33.3%)        | 2 (9.5%)             |
| <b>Staining Score</b>                       |            |            |                    |                 |                  |                      |
| 0                                           | 3 (14.3%)  | 8 (38.1%)  | 7 (33.3%)          | 14 (66.7%)      | 1 (4.8%)         | 9 (42.9%)            |
| 1                                           | 0 (0.0%)   | 0 (0.0%)   | 3 (14.3%)          | 0 (0.0%)        | 0 (0.0%)         | 0 (0.0%)             |
| 2                                           | 1 (4.8%)   | 4 (19.0%)  | 3 (14.3%)          | 1 (4.8%)        | 2 (9.5%)         | 2 (9.5%)             |
| 3                                           | 1 (4.8%)   | 2 (9.5%)   | 3 (14.3%)          | 0 (0.0%)        | 0 (0.0%)         | 2 (9.5%)             |
| 4                                           | 4 (19.0%)  | 5 (23.8%)  | 3 (14.3%)          | 2 (9.5%)        | 3 (14.3%)        | 2 (9.5%)             |
| 5                                           | 2 (9.5%)   | 0 (0.0%)   | 1 (4.8%)           | 2 (9.5%)        | 2 (9.5%)         | 3 (14.3%)            |
| 6                                           | 4 (19.0%)  | 1 (4.8%)   | 0 (0.0%)           | 1 (4.8%)        | 6 (28.6%)        | 1 (4.8%)             |
| 7                                           | 6 (28.6%)  | 1 (4.8%)   | 1 (4.8%)           | 1 (4.8%)        | 7 (33.3%)        | 2 (9.5%)             |
